# Supplementary material for: Circadian Gene PER2 Silencing Downregulates PPARG and SREBF1 and Suppresses Lipid Synthesis in Bovine Mammary Epithelial Cells
Source: MDPI journal article supplement (doi:10.3390/biology10121226), 2021-11-24
Supplement: s1 [file s1]

Table S1. The sequences of siRNAs for PER2 silencing

| siRNA            | sense                   | antisense               |
|------------------|-------------------------|-------------------------|
| siRNA-PER2-a     | CCAGAAACCUUUGGCCUAATT   | UUAGGCCAAAGGUUUCUGGTT   |
| siRNA-PER2-b     | GCAACCCUGCUUCAGAAAUTT   | AUUUCUGAAGCAGGGUUGCTT   |
| siRNA-PER2-c     | GGAGGAGACCGAAACUUGUAATT | UUACAGUUUCGGCUCUCCUCCTT |
| Negative control | UUCUCCGAACGUGUCACGUTT   | ACGUGACACGUUCGGAGAATT   |

Table S2. The Primer sequences of apoptosis pathway genes

| Gene                          | NCBI accession | Primer sequence (F:5'→3')     | Primer sequence (R:5'→3') |
|-------------------------------|----------------|-------------------------------|---------------------------|
| <i>PER2</i>                   | NM_001192317.1 | agcgtgttccatagctccac          | atctcgtctcgtggcttt        |
| Cell apoptosis-related genes  |                |                               |                           |
| <i>Caspase 3</i>              | NM_001077840.1 | ggagacgggttgaggacaat          | cagagtgcccaactgactga      |
| <i>Caspase 8</i>              | NM_001045970.2 | catcatctatggctccgatg          | gagtcggctcacaacggctac     |
| <i>P53</i>                    | NM-174201.2    | atttacgcgcggagtatttg          | ccagtgtgatgatggtgagg      |
| <i>β-actin</i>                | U02295.1       | actgttagctgcgttacaccctt       | tgctgtcaccttcaccgttc      |
| Lipid synthesis-related genes |                |                               |                           |
| <i>SCD</i>                    | NM_173959.4    | taccacgttcttcattgattgc        | acgtcatctttagcatcctggt    |
| <i>LPL</i>                    | NM_001075120.1 | gaccccttggtgaatgtgtgtg        | gccatatagagaacatgccgca    |
| <i>ACACA</i>                  | NM_174224.2    | ttaatcaaacactccgtatgtgaccaa   | gactgccgaaacatttctgggat   |
| <i>SREBF1</i>                 | NM_001113302.1 | acgccatcgagaaacgctac          | gtgcgcagactcaggttctc      |
| <i>mTOR</i>                   | XM_002694043.6 | <u>atgctgtccctggctccttatg</u> | gggtcagagagtggccttcaa     |
| <i>FAS</i>                    | U34794.1       | gaacatgggctagaagtgaac         | ctattgggatgaggaggatcag    |
| <i>PPARG</i>                  | NM_181024.2    | taccaaagtgaatcaaagtgg         | atagtgaaccctgacgttta      |
| <i>LPIN1</i>                  | NM_001206156.2 | ttcccgaccgtcaacaccta          | caacgggctggactcttca       |
| <i>β-actin</i>                | U02295.1       | actgttagctgcgttacaccctt       | tgctgtcaccttcaccgttc      |
